# Supplementary material for: Hypothalamic free fatty acid receptor-1 regulates whole-body energy balance
Source: PubMed Central journal article supplement — Mol Metab. 2023 Nov 29;79:101840. doi: 10.1016/j.molmet.2023.101840 (PMC10784317; doi:10.1016/j.molmet.2023.101840), 2023-11-29

# Figure 1C

**Original**

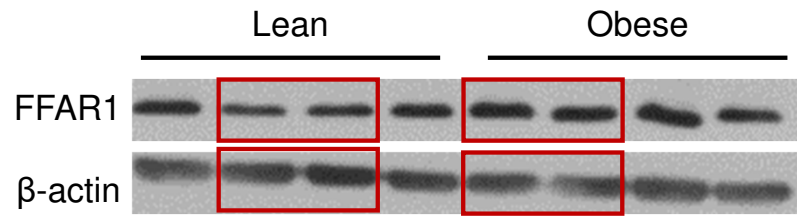

**Spliced**

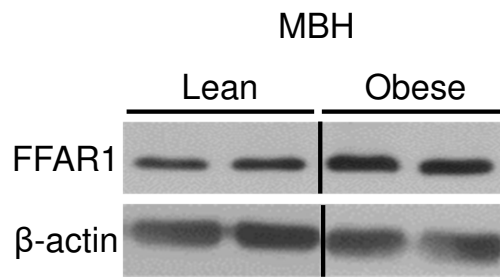

**Figure 1E**

**Original**

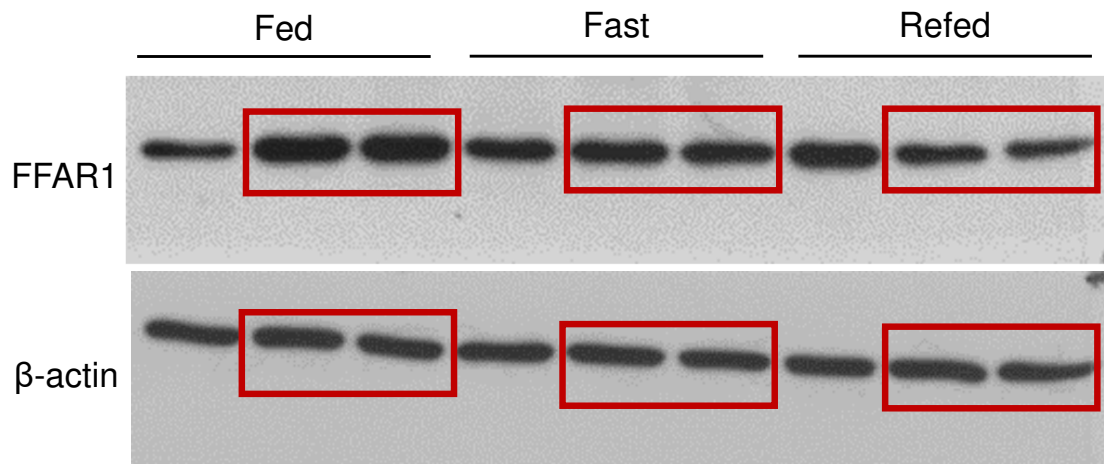

**Spliced**

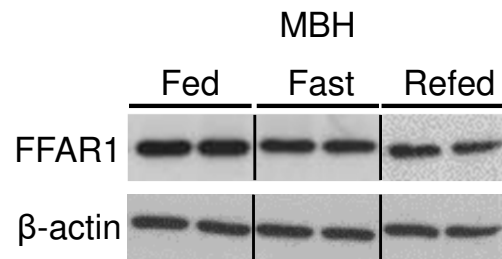

Figure 3I (1/2)

Original

Vehicle

TUG-905

UCP1

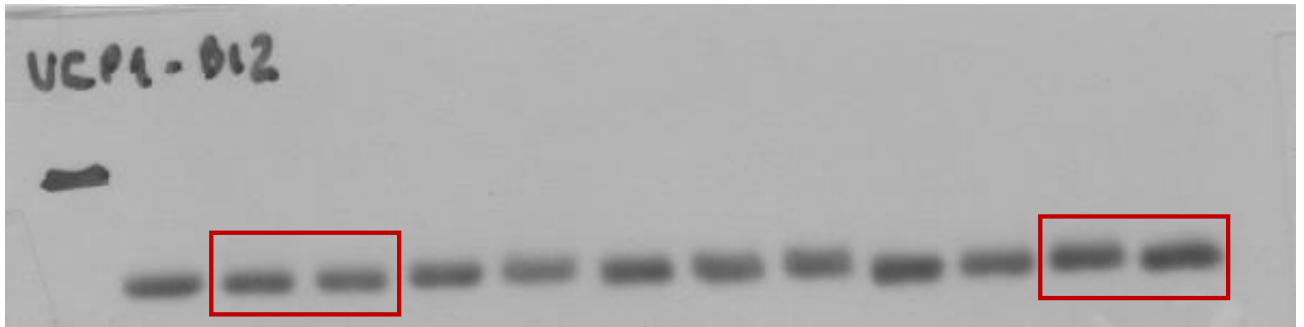

$\alpha$ -tubulin

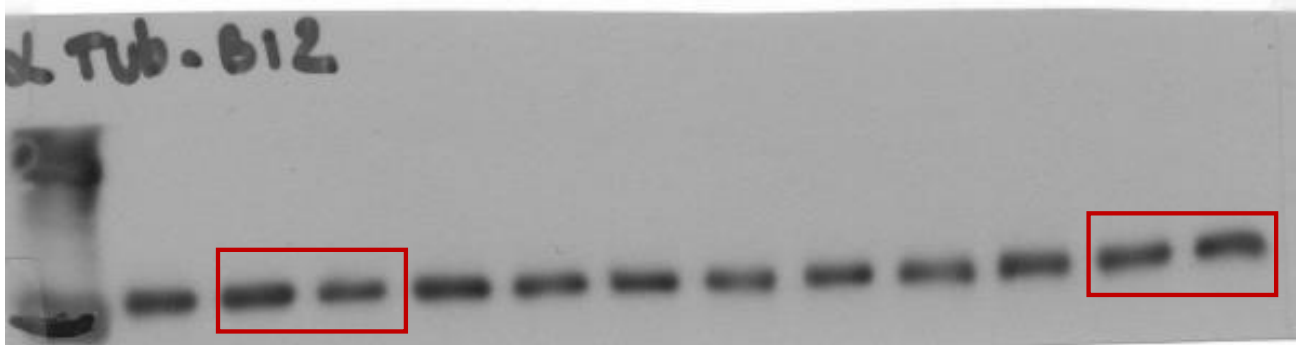

Original

Vehicle

TUG-905

UCP3

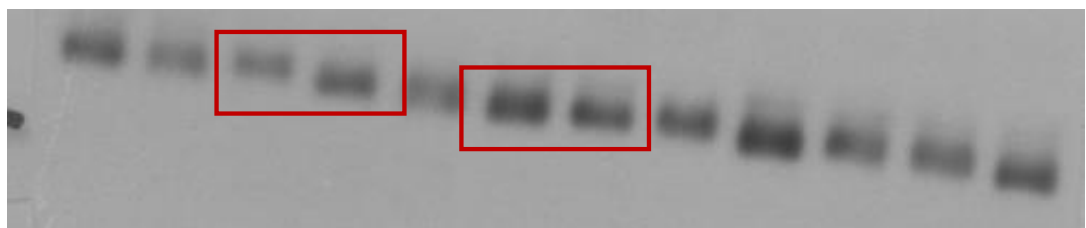

PPAR $\gamma$

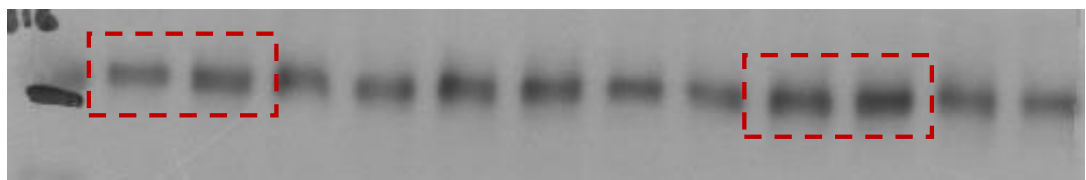

$\alpha$ -tubulin

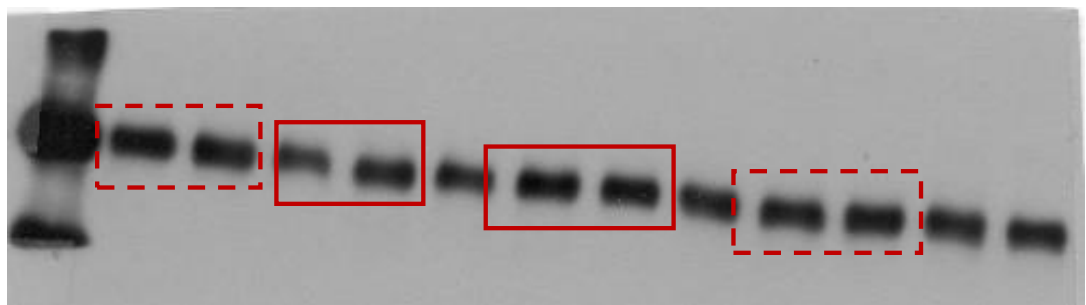

# Figure 3I (2/2)

## Original

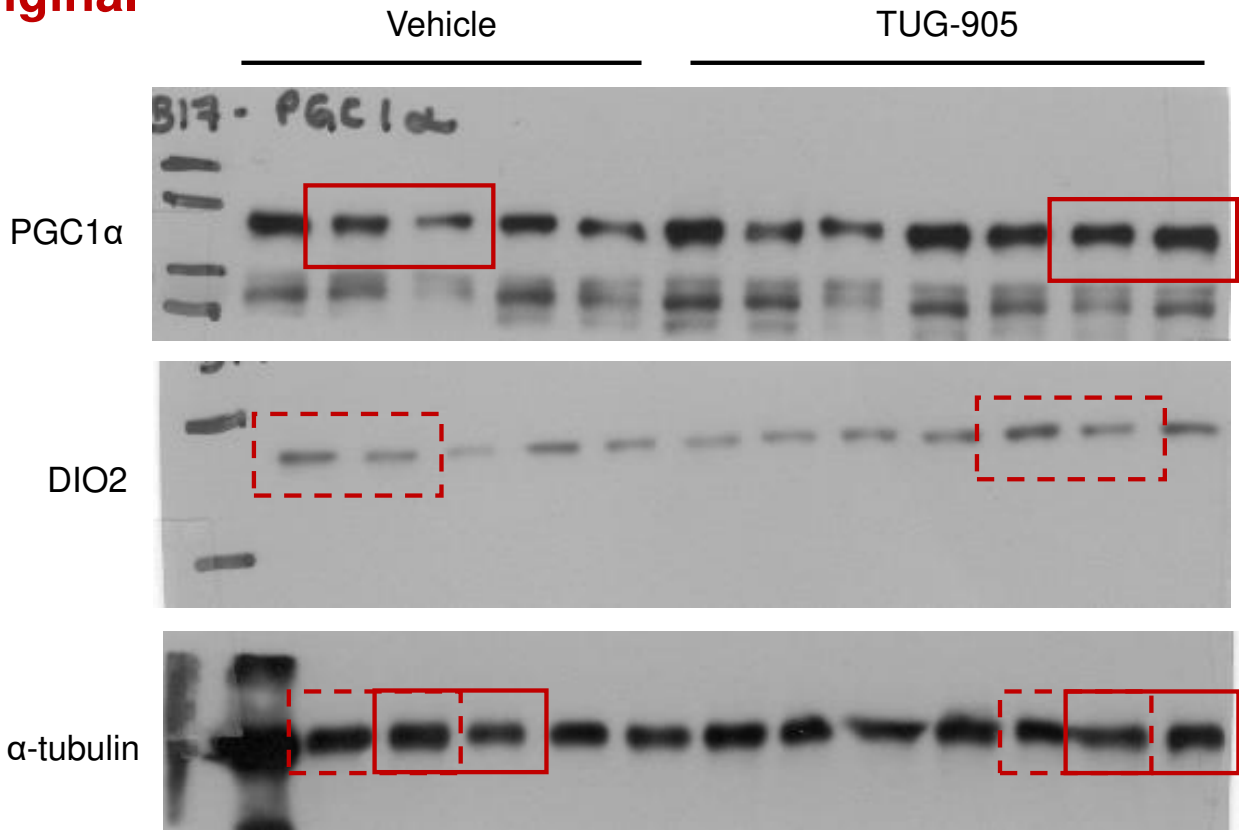

## Spliced

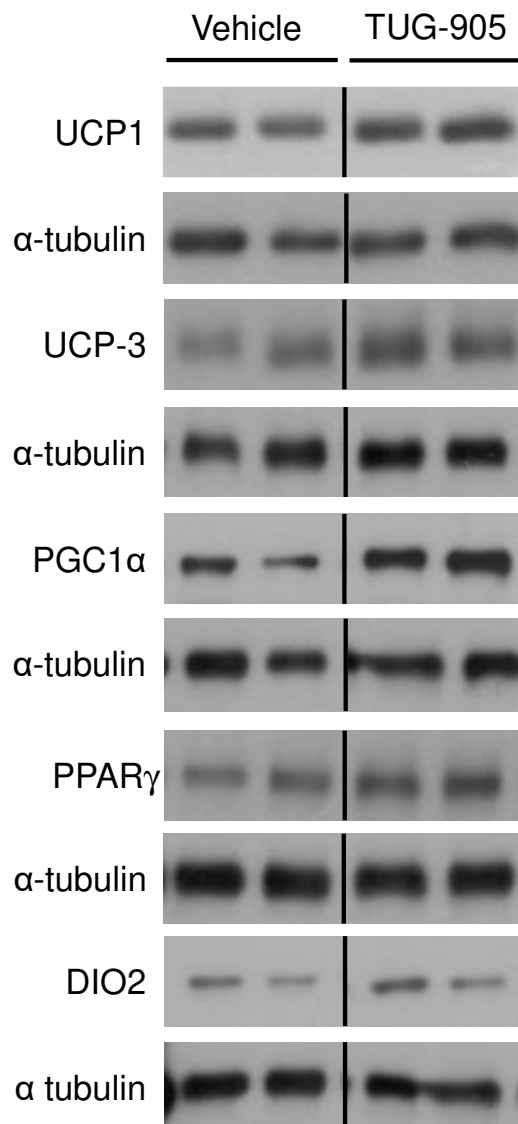

# Figure 4A

## Original

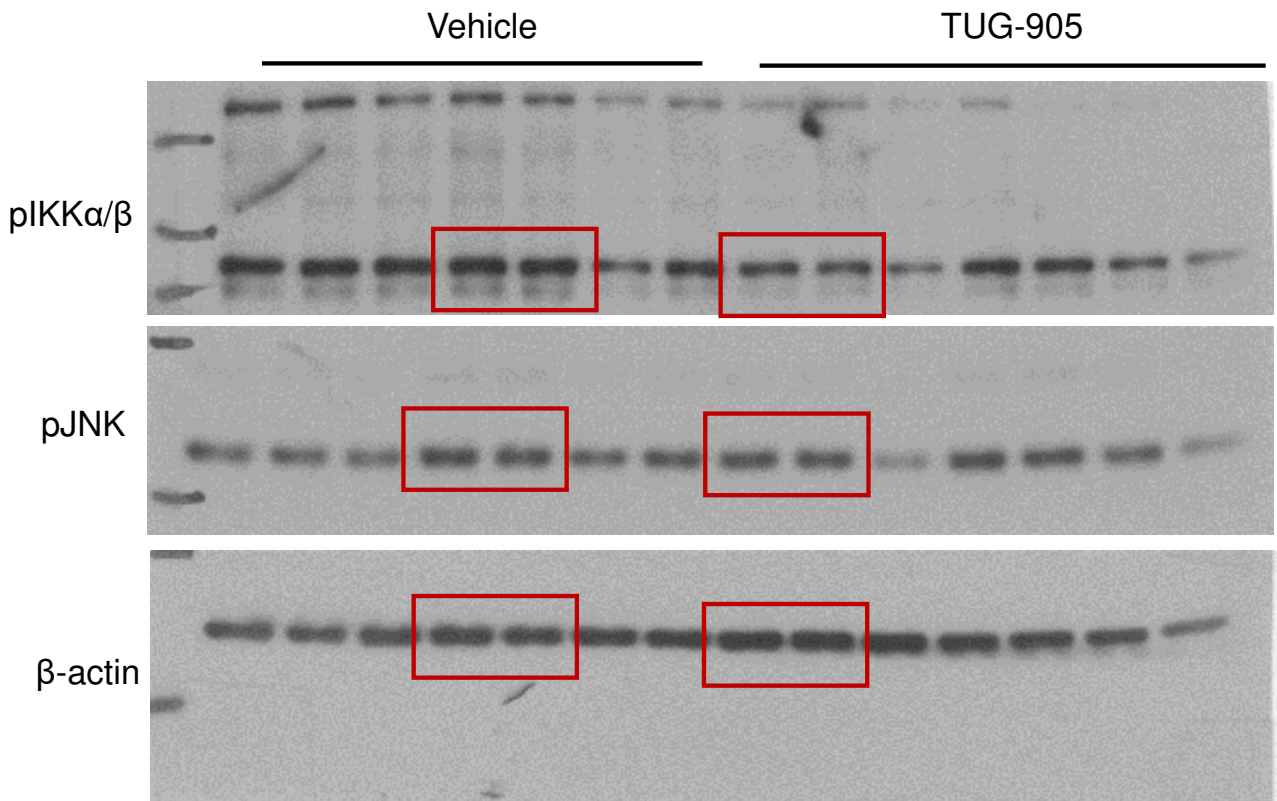

## Spliced

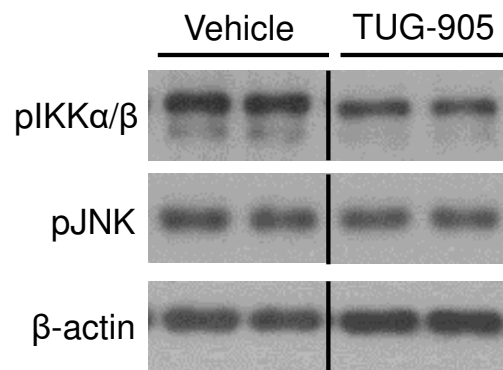

**Figure 4C (1/3)**

**Original**

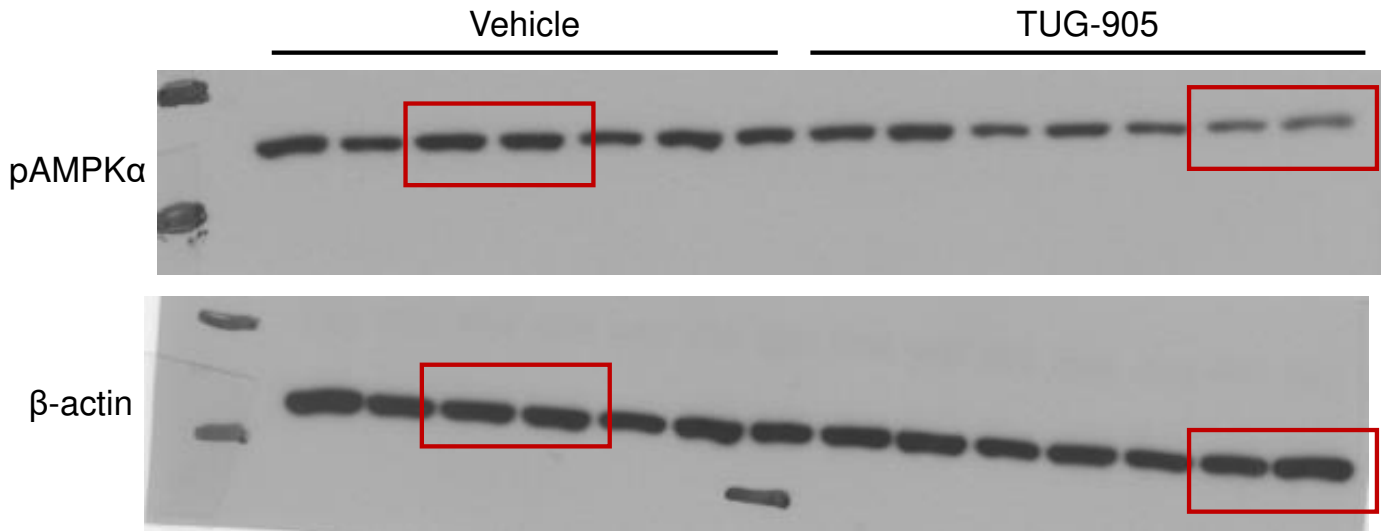

**Original**

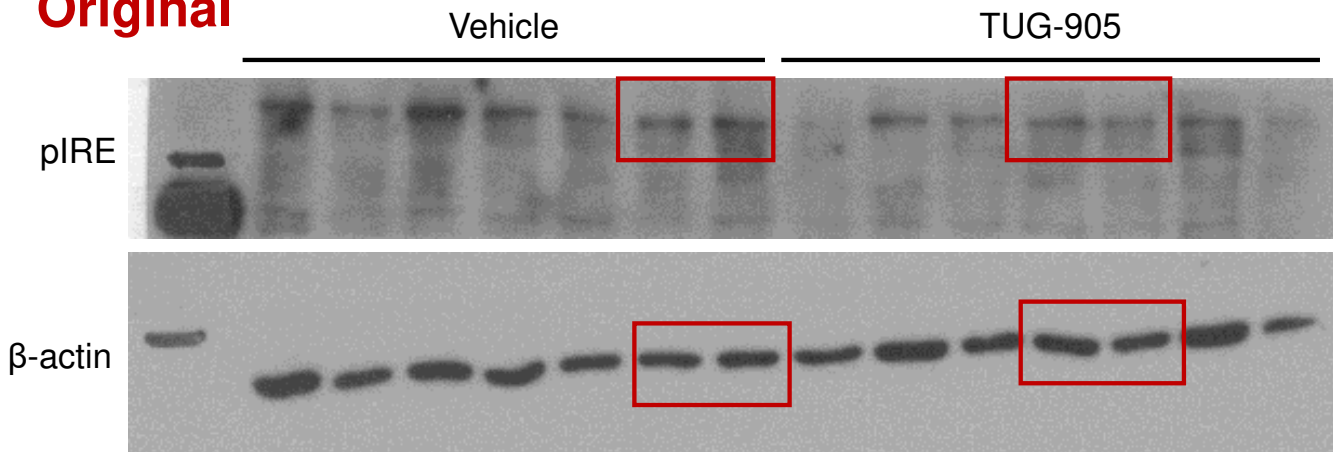

**Original**

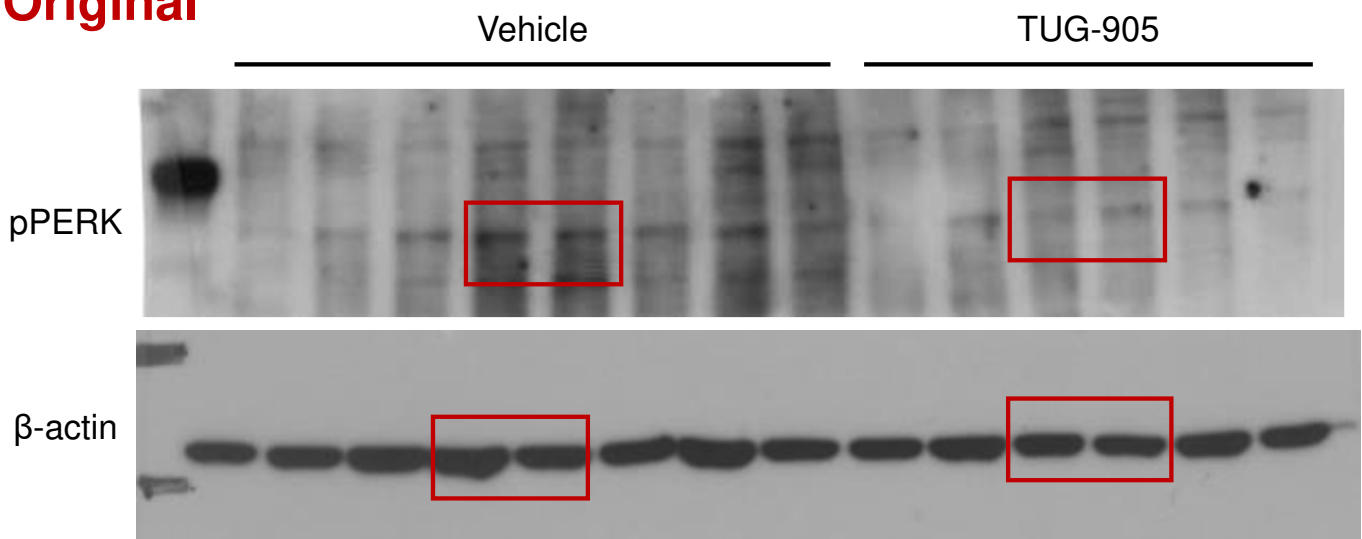

**Figure 4C (2/3)**

**Original**

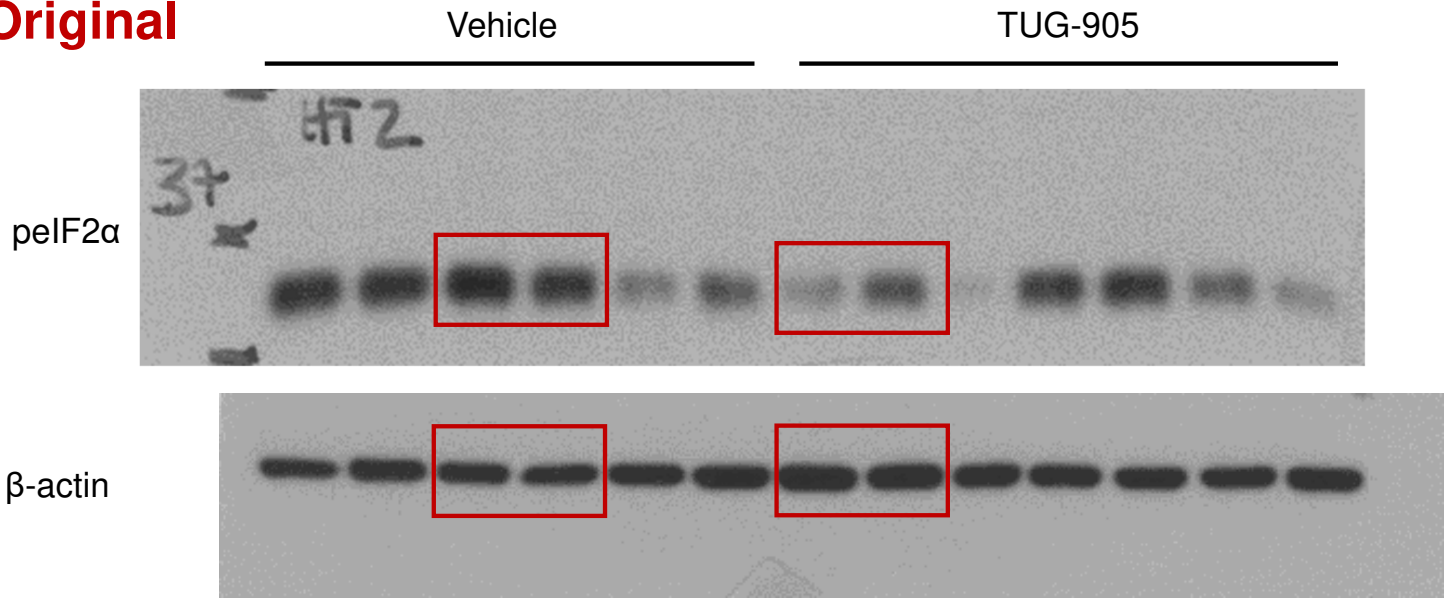

**Original**

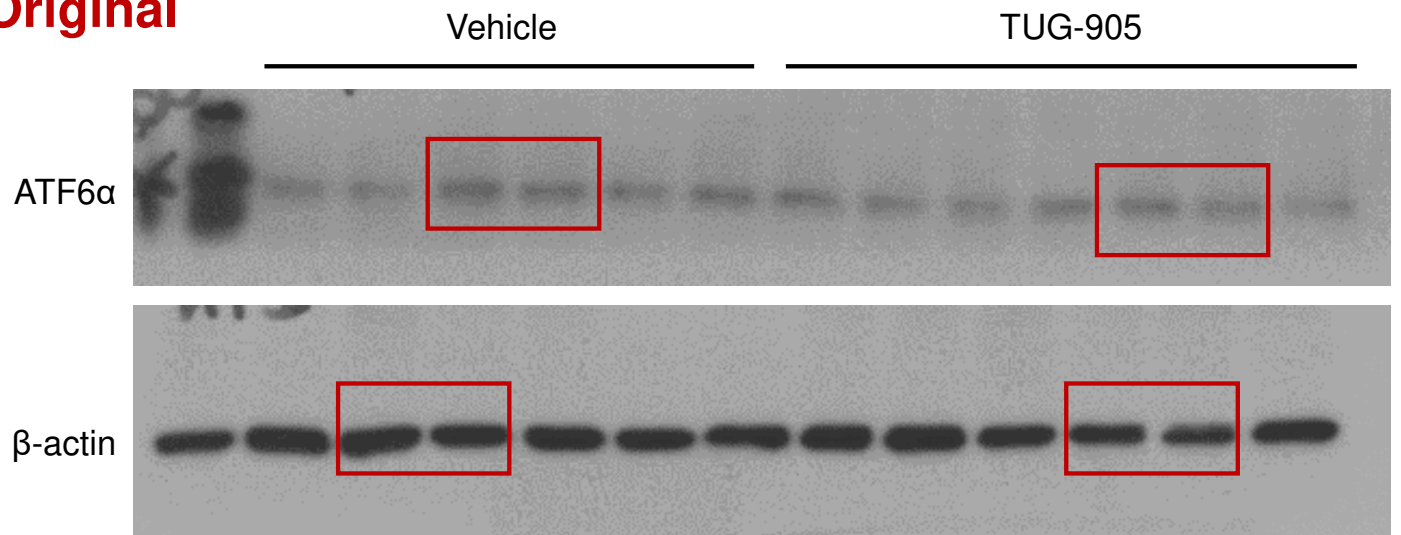

**Original**

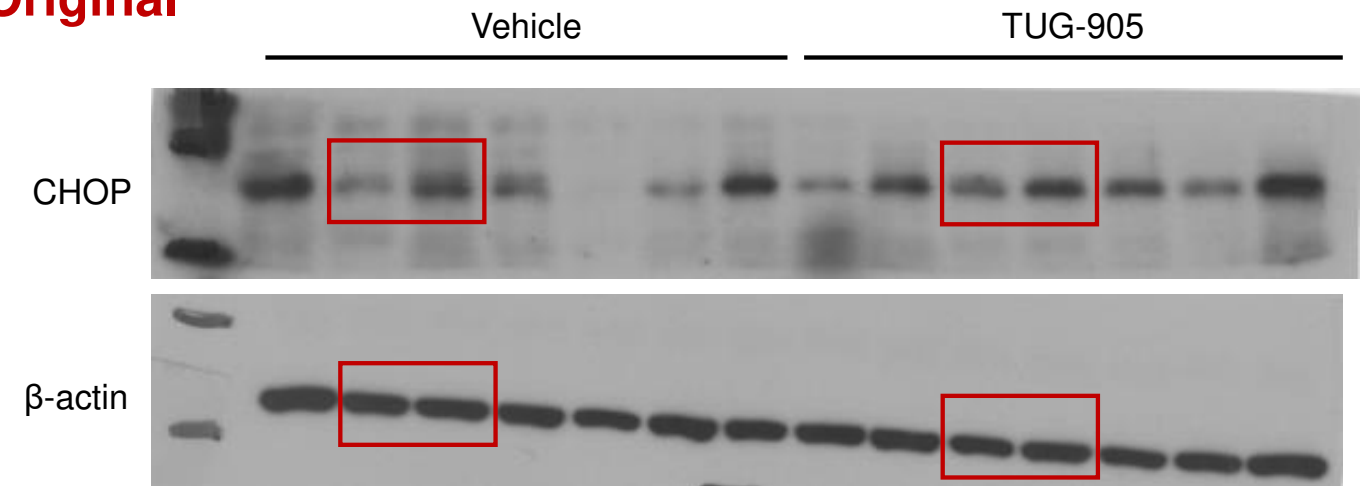

**Figure 4C (3/3)**

**Spliced**

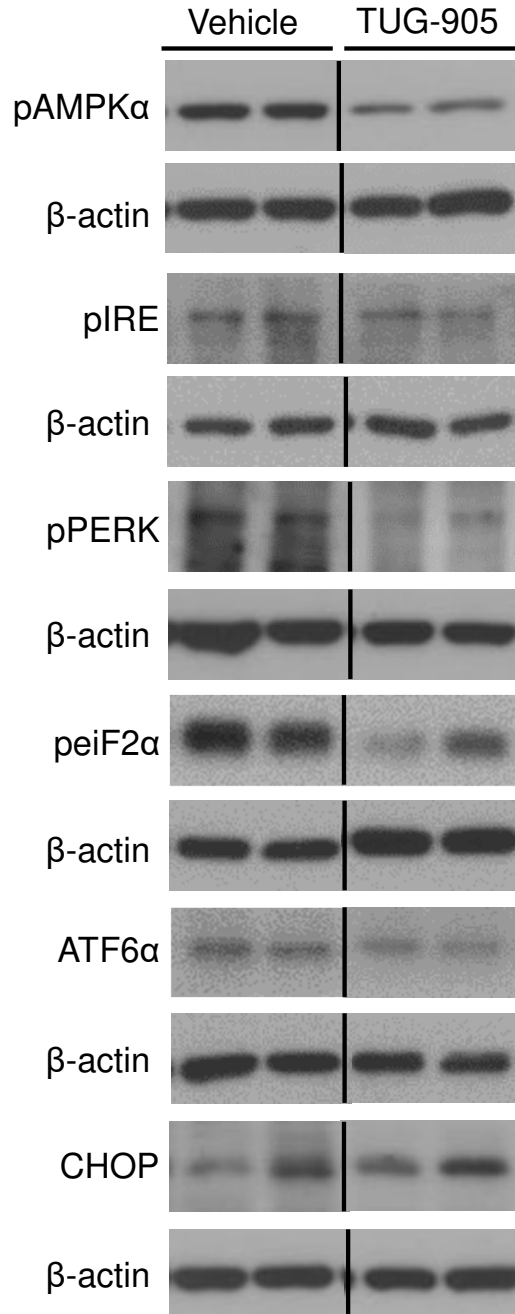



Figure 5C

Original

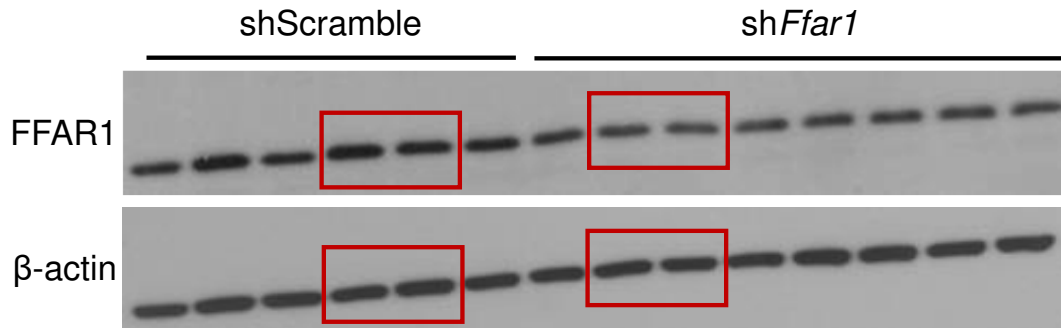

MBH

Spliced

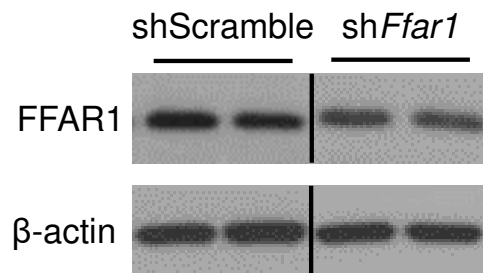

# Figure 6L

## Original

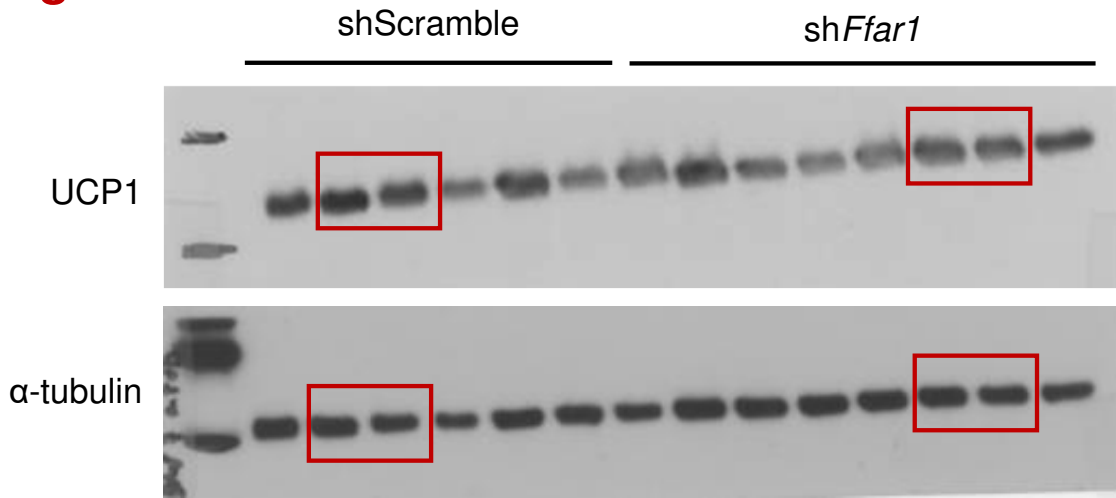

## Original

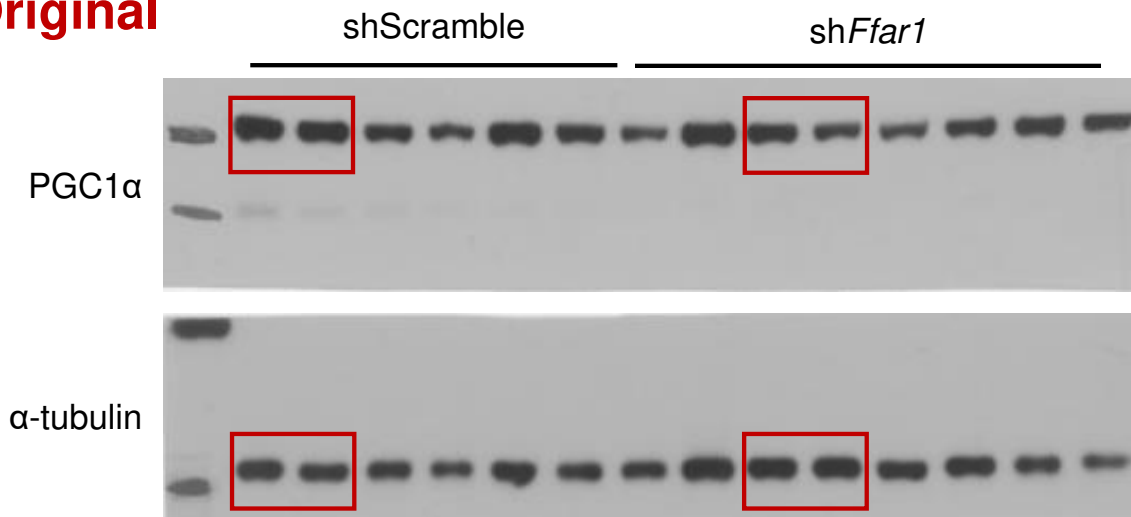

## Spliced

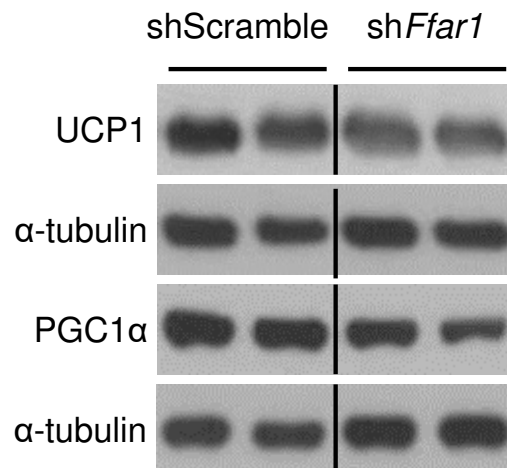

**Figure 7A (1/2)**

**Original**

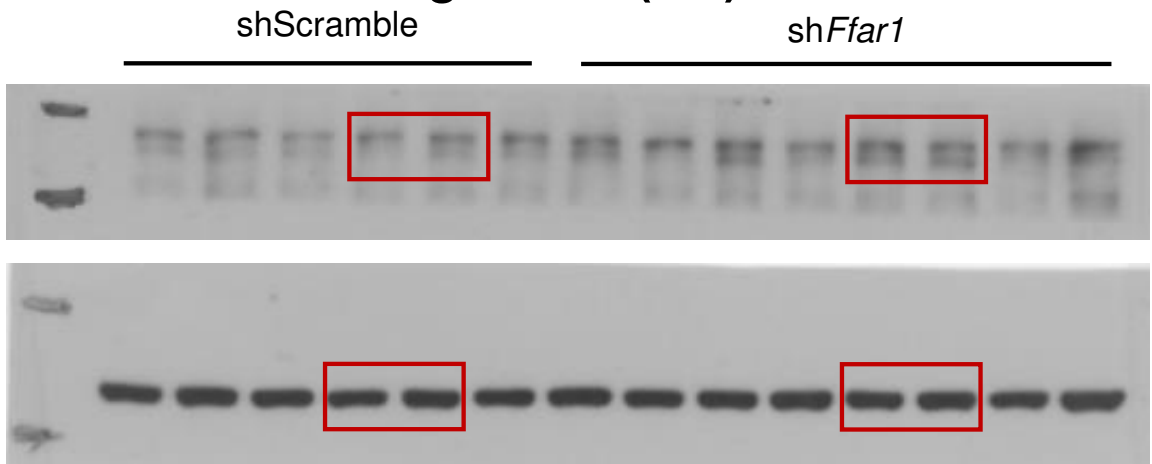

**Original**

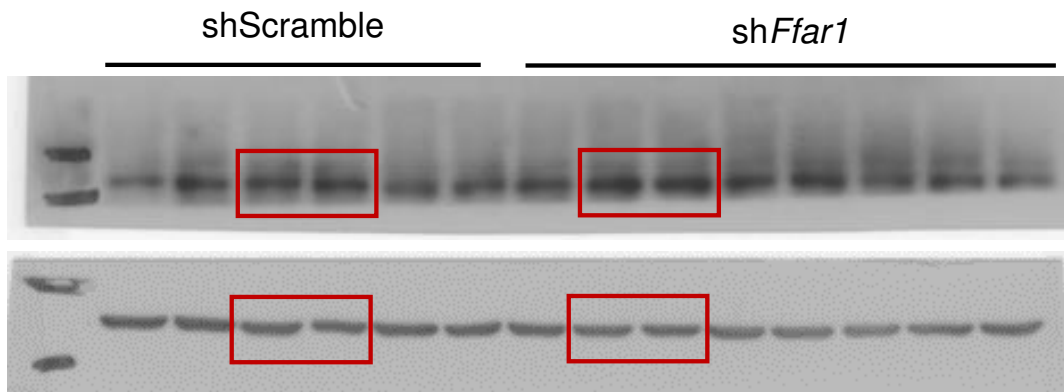

**Original**

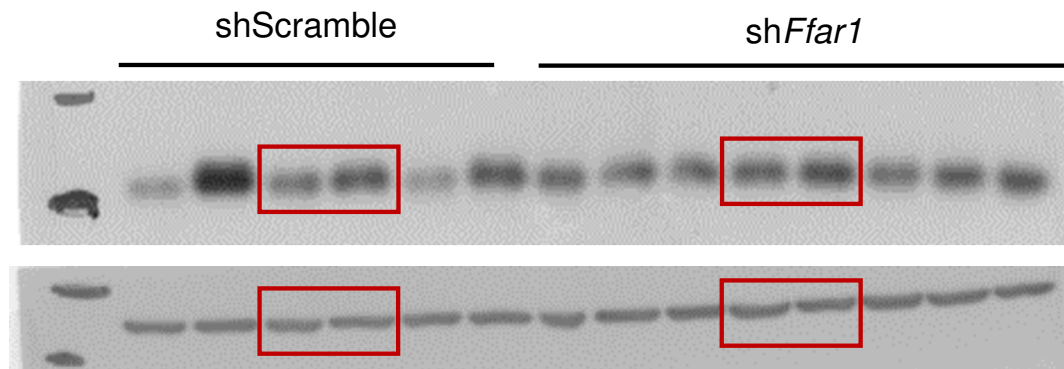

**Original**

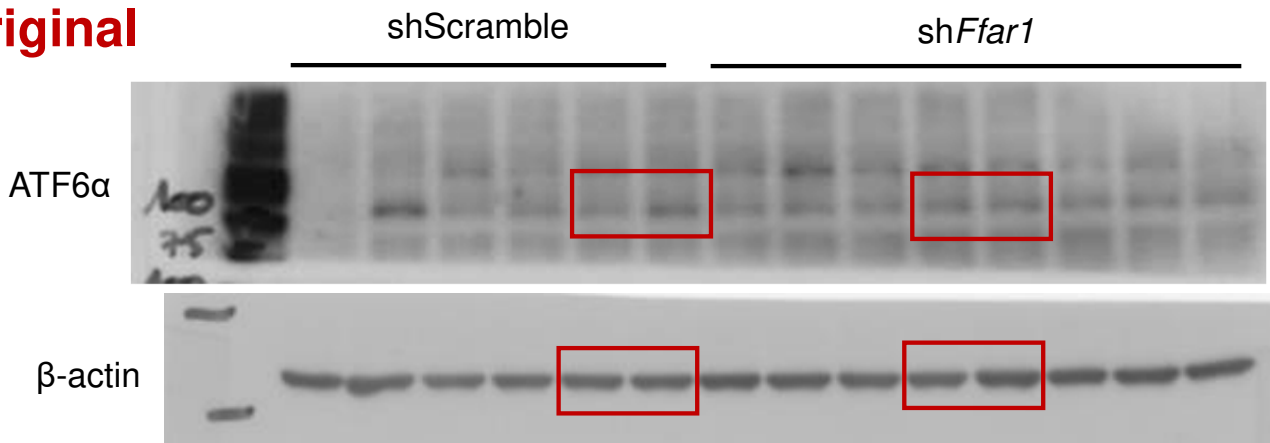

**Original**

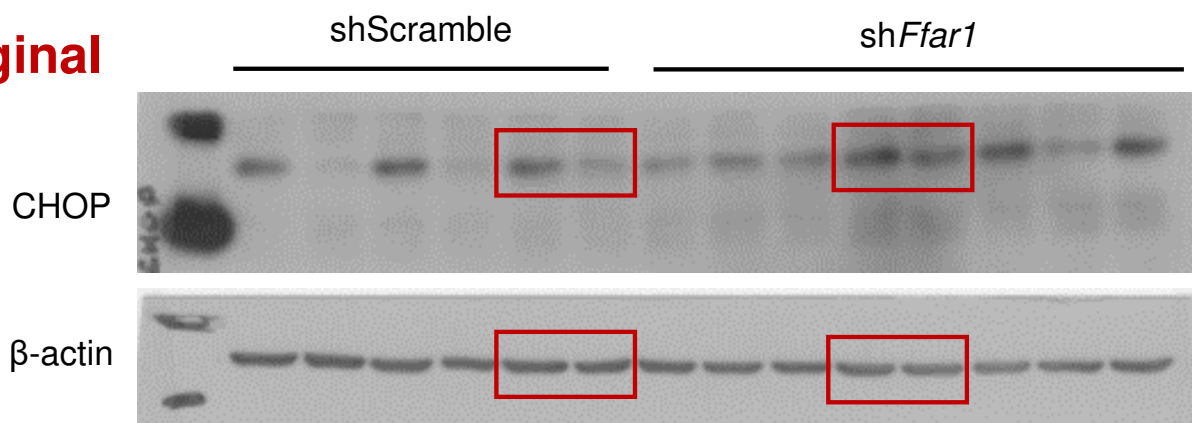

Figure 7A (2/2)

Spliced

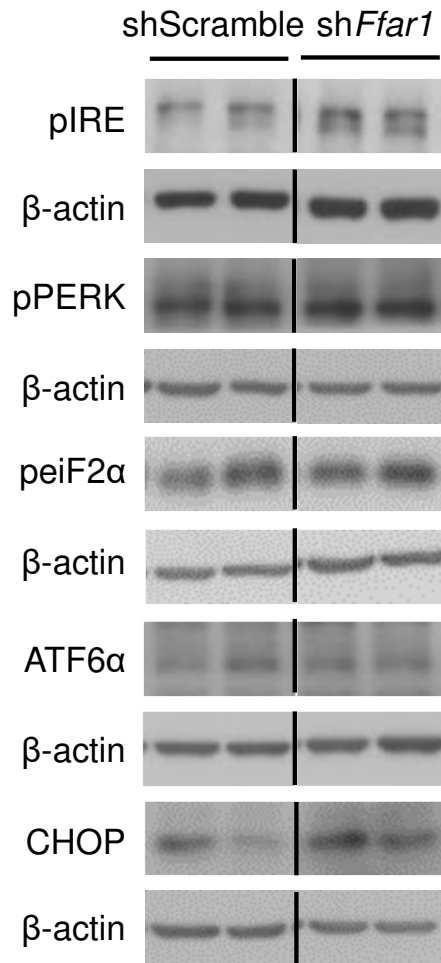

# Figure 7C

## Original

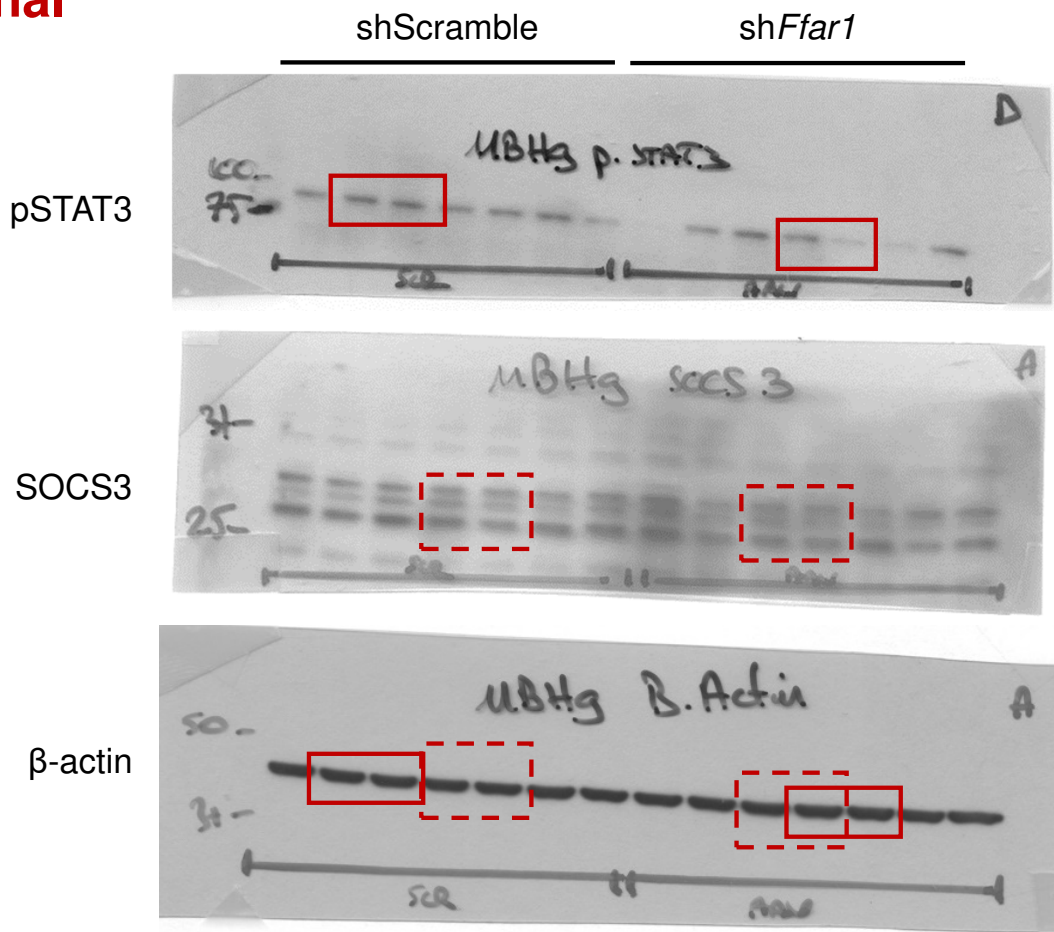

## Spliced

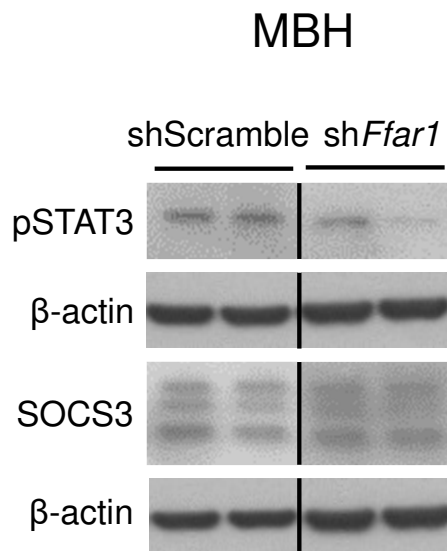

# Figure 8D

**Original**

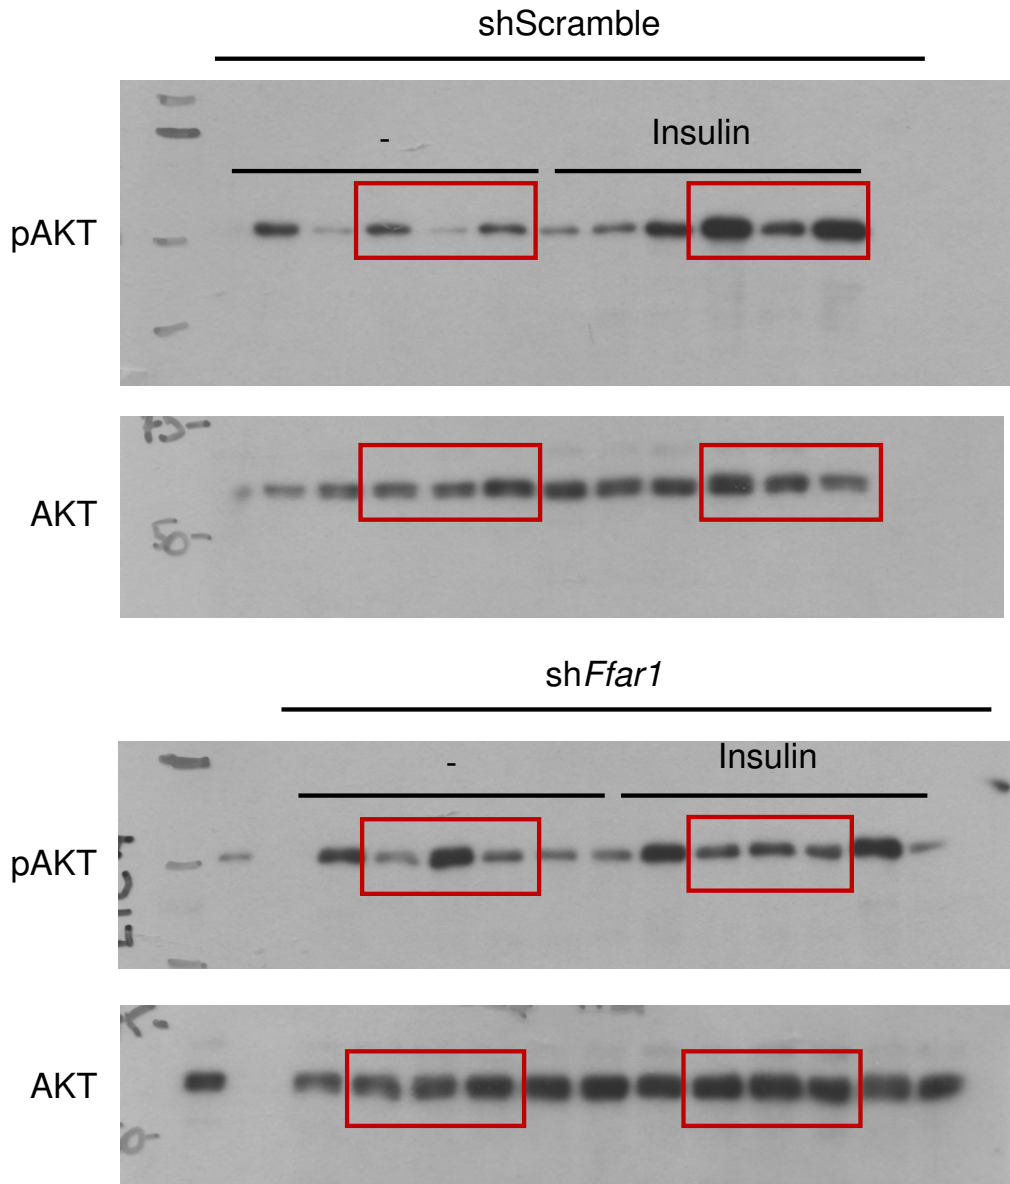

**Spliced**

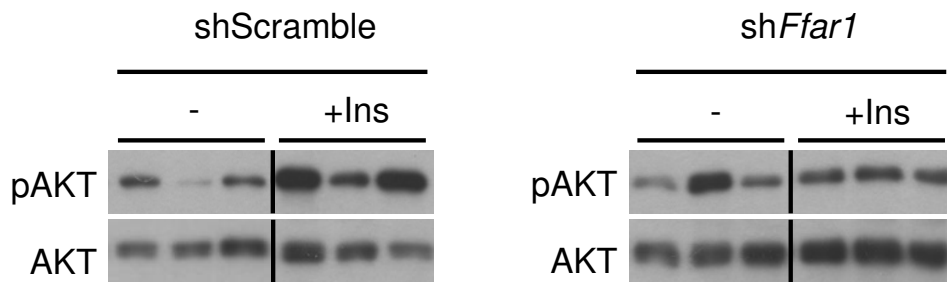

Supplement: mmc2.pdf [file mmc2.pdf]
