# Supplementary material for: Hypothalamic free fatty acid receptor-1 regulates whole-body energy balance
Source: PubMed Central journal article supplement — Mol Metab. 2023 Nov 29;79:101840. doi: 10.1016/j.molmet.2023.101840 (PMC10784317; doi:10.1016/j.molmet.2023.101840), 2023-11-29
Supplement: mmc1.pdf [file mmc1.pdf]

**Supplementary Table 1. Antibodies used for western blot**

| <b>Protein target</b>           | <b>Company<br/>(catalog number)</b> | <b>Specie</b> | <b>Dilution</b> |
|---------------------------------|-------------------------------------|---------------|-----------------|
| FFAR1                           | Sigma-Aldrich (SAB2108661)          | rabbit        | 1:5000          |
| $\beta$ -Actin                  | Sigma-Aldrich (A5316)               | mouse         | 1:5000          |
| UCP1                            | Abcam (ab10983)                     | rabbit        | 1:5000          |
| UCP3                            | Santa Cruz (sc-33182)               | rabbit        | 1:1000          |
| PGC1 $\alpha$                   | Santa Cruz (sc-17380)               | mouse         | 1:1000          |
| PPAR $\gamma$                   | Santa Cruz (sc-7273)                | mouse         | 1:1000          |
| DIO2                            | Abcam (ab ab77779)                  | rabbit        | 1:1000          |
| $\alpha$ -Tubulin               | Sigma-Aldrich (T5168)               | mouse         | 1:5000          |
| p-IKK $\alpha/\beta$ (Ser- 180) | Santa Cruz (sc-23470)               | rabbit        | 1:1000          |
| p- SAPK/JNK (Thr183/Tyr185)     | Cell Signaling (#4671)              | rabbit        | 1:1000          |
| GPR78                           | Cell Signaling (#3183)              | rabbit        | 1:1000          |
| p-IRE1 (Ser724)                 | Abcam (ab48187)                     | rabbit        | 1:1000          |
| p-PERK (Thr980)                 | Cell Signaling (#3179)              | rabbit        | 1:1000          |
| p-eiF2a (Ser 52)                | Santa Cruz (sc-101670)              | rabbit        | 1:1000          |
| ATF-6 $\alpha$ (F-7)            | Santa Cruz (sc-166659)              | mouse         | 1:1000          |
| CHOP                            | Cell Signaling (#5554)              | rabbit        | 1:1000          |
| p-STAT3 (Y705)                  | Abcam (ab76315)                     | rabbit        | 1:1000          |
| SOCS3                           | Cell Signaling (#23064)             | rabbit        | 1:1000          |
| p-AKT (Ser 473)                 | Cell Signaling (#9271)              | rabbit        | 1:1000          |
| AKT                             | Cell Signaling (#9272)              | rabbit        | 1:1000          |

**Supplementary Table 2. Primers used for RT-PCR**

| <b>Primers</b>  | <b>ThermoFisher TaqManGene<br/>Expression Assays ID</b> |
|-----------------|---------------------------------------------------------|
| <i>Ucp1</i>     | Mm01244861_m1                                           |
| <i>Pparg</i>    | Mm01184322_m1                                           |
| <i>Ppargc1a</i> | Mm01208835_m1                                           |
| <i>Prdm16</i>   | Mm01266512_m1                                           |
| <i>Hprt</i>     | Mm01545399_m1                                           |

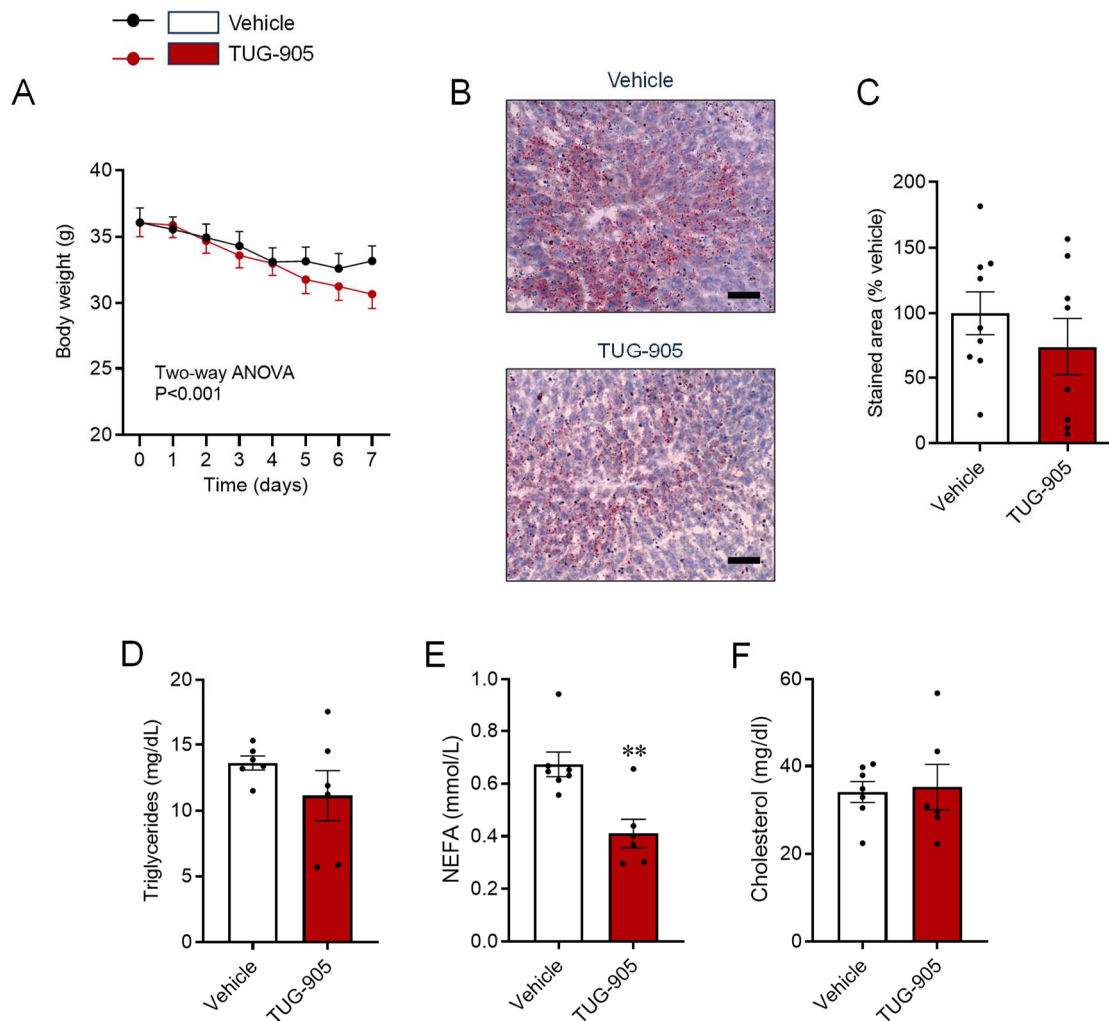

**Supplementary Figure 1. Effect of central TUG-905 administration on energy balance and lipid metabolism**

(A) Absolute body weight change during the 7 days experimental period (n=20-24 mice/group), (B) representative microphotographs of Oil-Red staining (10X, scale bar: 200  $\mu$ m), (C) hepatic lipid content in Oil Red O-stained sections (n=8-9 mice/group), circulating (D) triglycerides, (E) NEFA and (F) cholesterol (n=6-7 mice/group) of vehicle and TUG-905 ICV-treated DIO mice. Data are expressed as MEAN $\pm$ SEM. Statistical significance was determined by two-way ANOVA (A) or Student's t-test (C, D, E, and F); \*\*P<0.01 vs. vehicle.

A

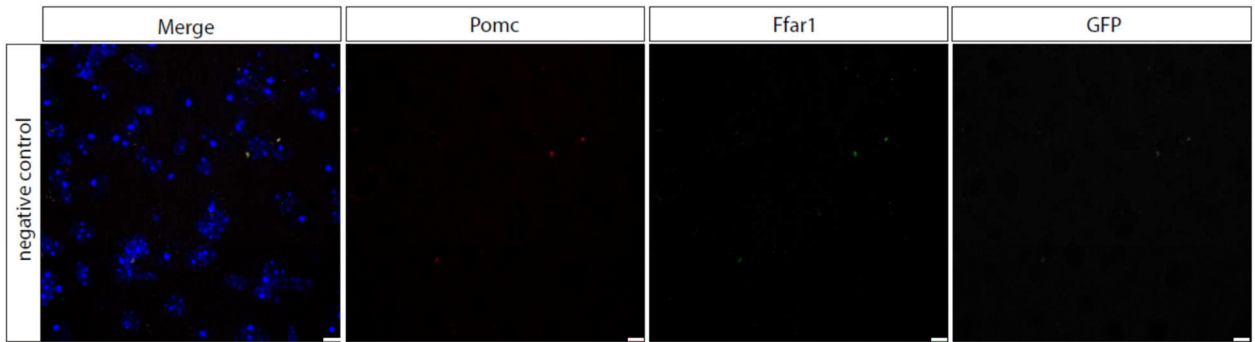

● POMC-Cre shScramble  
● POMC-Cre shFfar1

B

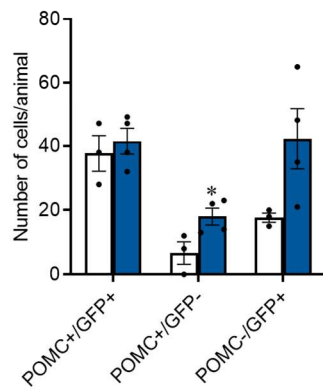

C

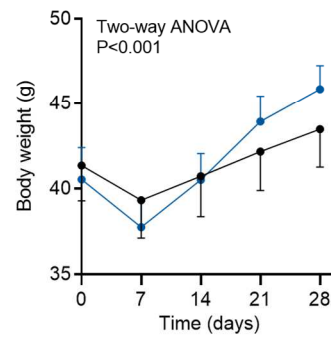

**Supplementary Figure 2. Effect of POMC-specific Ffar1 knockdown on energy balance**

(A) Negative control probes for GFP and FFAR1, (B) number of POMC<sup>+</sup>/GFP<sup>+</sup>, POMC<sup>+</sup>/GFP<sup>-</sup>, POMC<sup>-</sup>/GFP<sup>-</sup> cells (n= 3-4 mice/group) and (C) absolute body weight change (n= 11 mice/group) of POMC-Cre mice treated with AAV encoding shScramble or shFfar1. Data are expressed as MEAN±SEM. Statistical significance was determined by two-way ANOVA (C) or Student's t-test (B). \*P < 0.05 vs. shScramble.
